# Supplementary material
Source: publisher figshare collection journal article supplement (https://acs.figshare.com/ndownloader/files/3699400)
Supplement: Supplementary file 1 [file 3699400]

## Structural and Catalytic Effects of Iron- and Scandium-Doping on a Strontium Cobalt Oxide Electrocatalyst for Water Oxidation

Bryan R. Wygant<sup>a</sup>, Karalee A. Jarvis<sup>b</sup>, William D. Chemelewski<sup>b</sup>, Oluwaniyi Mabayoje<sup>a</sup>, Hugo Celio<sup>b</sup>, and C. Buddie Mullins<sup>a,b,c,\*</sup>

<sup>a</sup>Department of Chemistry, University of Texas at Austin, Austin, Texas 78712, United States

<sup>b</sup>Texas Materials Institute, University of Texas at Austin, Austin, Texas 78712, United States

<sup>c</sup>McKetta Department of Chemical Engineering, University of Texas at Austin, Austin, Texas 78712, United States

\*For correspondence: mullins@che.utexas.edu

### Contents

|                                         |    |
|-----------------------------------------|----|
| XRD Data of SCO Precursors.....         | 2  |
| XPS Data of All SCO Samples .....       | 3  |
| TEM Figures of SCO Powders .....        | 9  |
| SEM Figures of All SCO Electrodes ..... | 12 |
| OER Performance .....                   | 14 |
| Supporting Tables .....                 | 14 |

## XRD Data of SCO Precursors

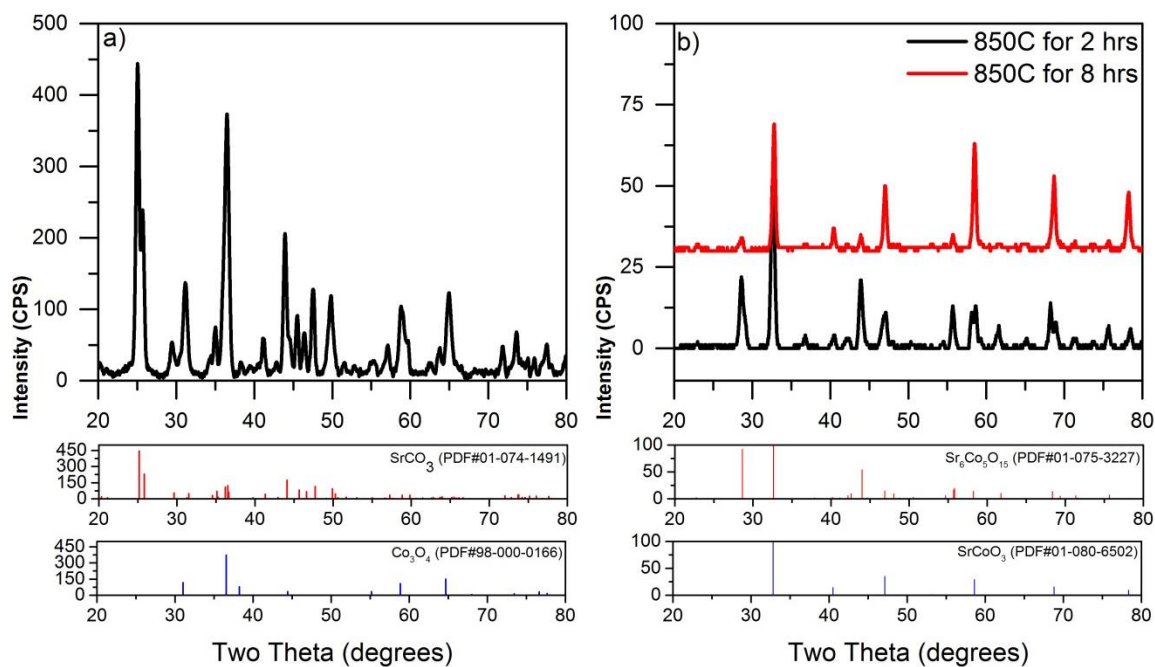

**Figure S1.** XRD spectra of a) SCO precursor annealed for 4.5 hours at 450°C, b) SCO precursor annealed at 850°C for 2 and 8 hours

## XPS Data of All SCO Samples

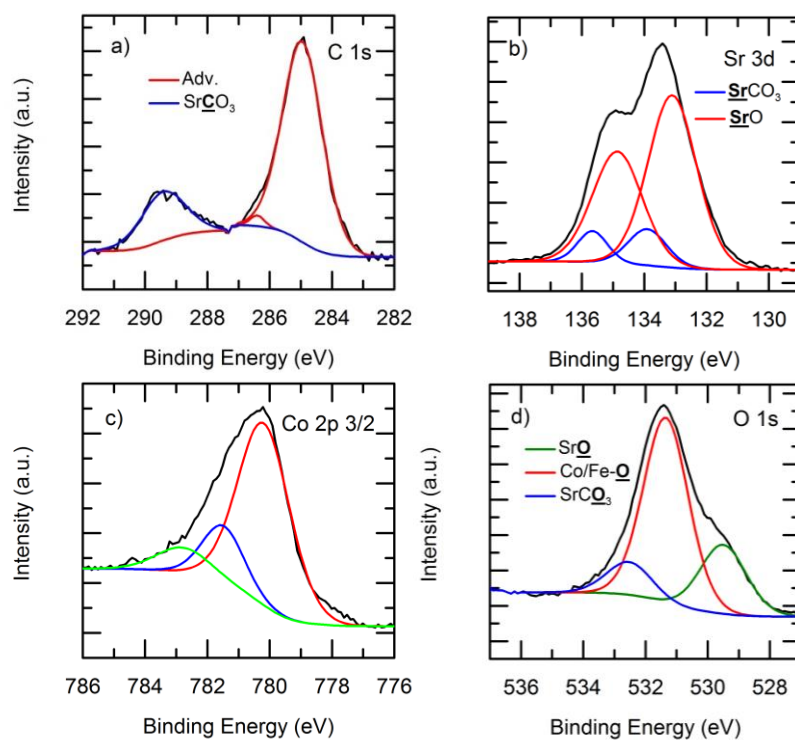

**Figure S2.** XPS spectra and fitted peaks for the 1%Fe-SCO sample. a) Spectra of the carbon 1s peak. b) Spectra of the strontium 3d 5/2 and 3/2 peaks. c) Spectra of the cobalt 2p peak. d) Spectra of the oxygen 1s peak.

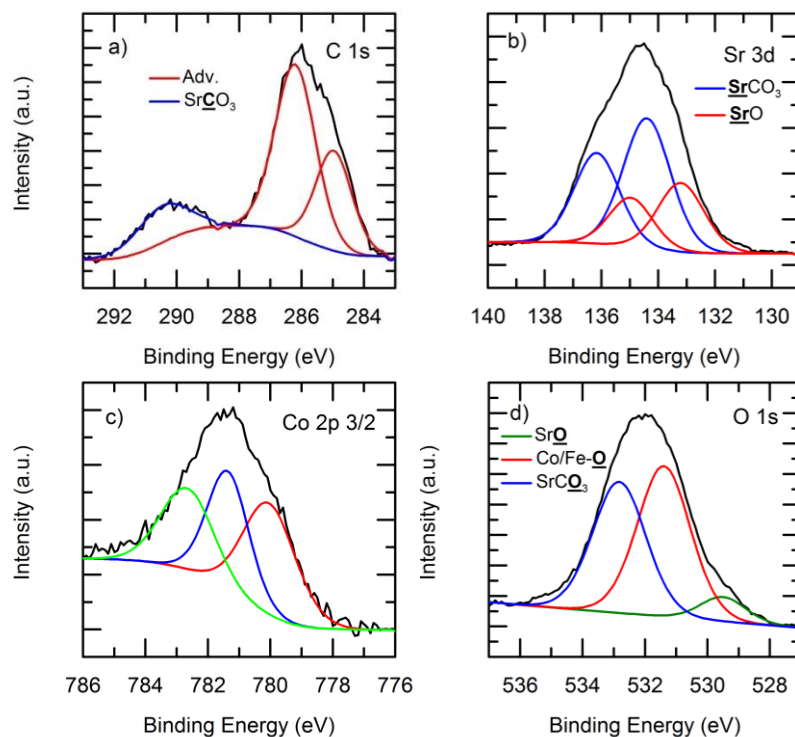

**Figure S3.** XPS spectra and fitted peaks for the 5%Fe-SCO sample. a) Spectra of the carbon 1s peak. b) Spectra of the strontium 3d 5/2 and 3/2 peaks. c) Spectra of the cobalt 2p peak. d) Spectra of the oxygen 1s peak.

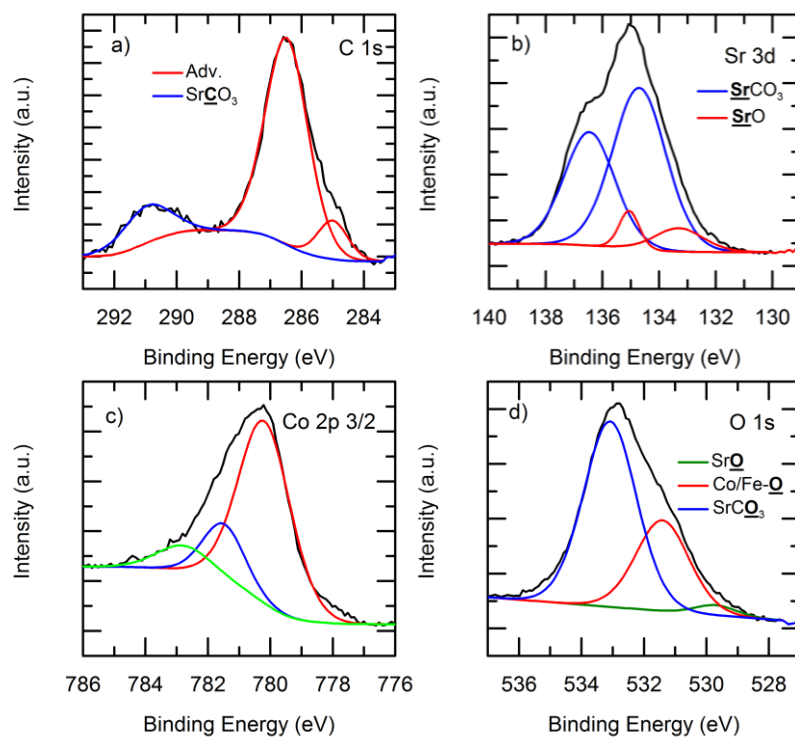

**Figure S4.** XPS spectra and fitted peaks for the 1%Sc-SCO sample. a) Spectra of the carbon 1s peak. b) Spectra of the strontium 3d 5/2 and 3/2 peaks. c) Spectra of the cobalt 2p peak. d) Spectra of the oxygen 1s peak.

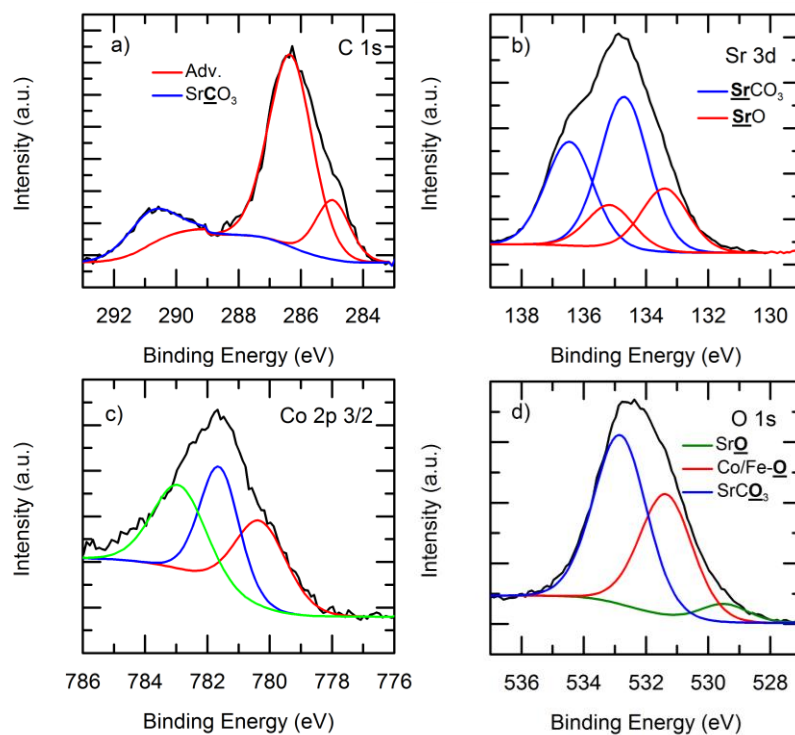

**Figure S5.** XPS spectra and fitted peaks for the 5%Sc-SCO sample. a) Spectra of the carbon 1s peak. b) Spectra of the strontium 3d 5/2 and 3/2 peaks. c) Spectra of the cobalt 2p peak. d) Spectra of the oxygen 1s peak.

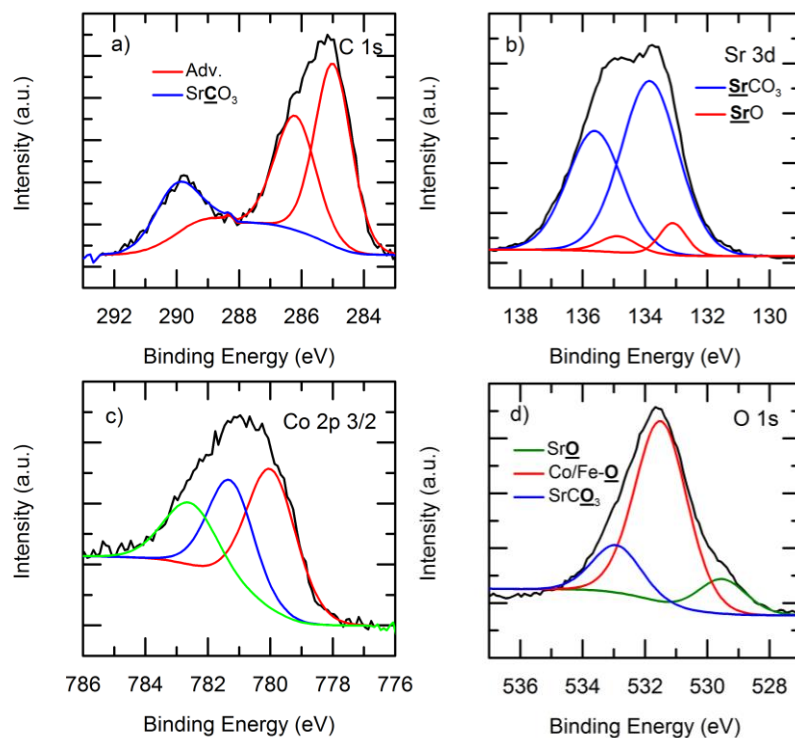

**Figure S6.** XPS spectra and fitted peaks for the 10%Sc-SCO sample. a) Spectra of the carbon 1s peak. b) Spectra of the strontium 3d 5/2 and 3/2 peaks. c) Spectra of the cobalt 2p peak. d) Spectra of the oxygen 1s peak.

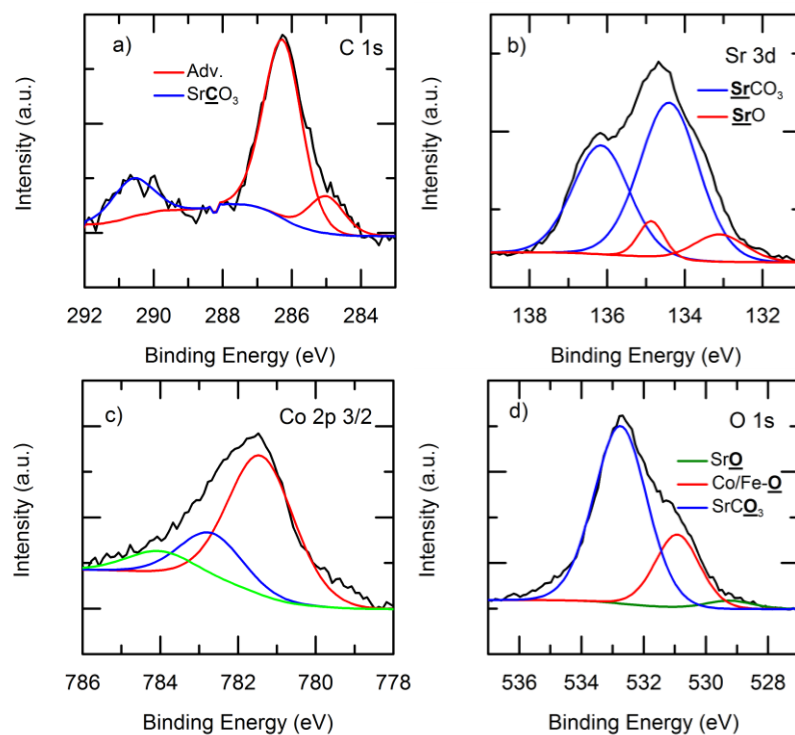

**Figure S7.** XPS spectra and fitted peaks for the UnSCO sample. a) Spectra of the carbon 1s peak. b) Spectra of the strontium 3d 5/2 and 3/2 peaks. c) Spectra of the cobalt 2p peak. d) Spectra of the oxygen 1s peak.

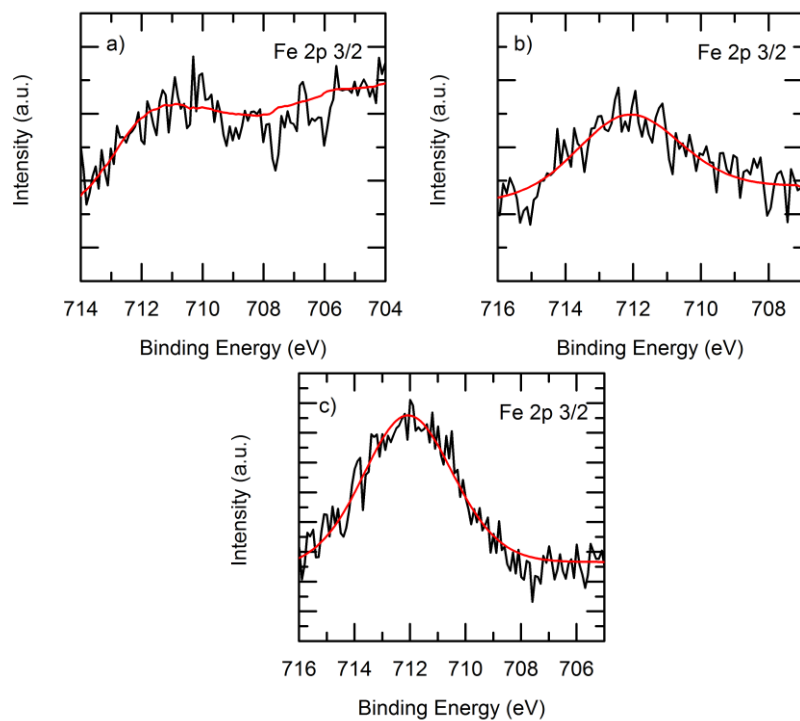

**Figure S8.** XPS spectra and fitted peaks for the Fe 2p 3/2 peaks of the Fe-SCO samples. a) 1%Fe-SCO b) 5%Fe-SCO c) 10%Fe-SCO

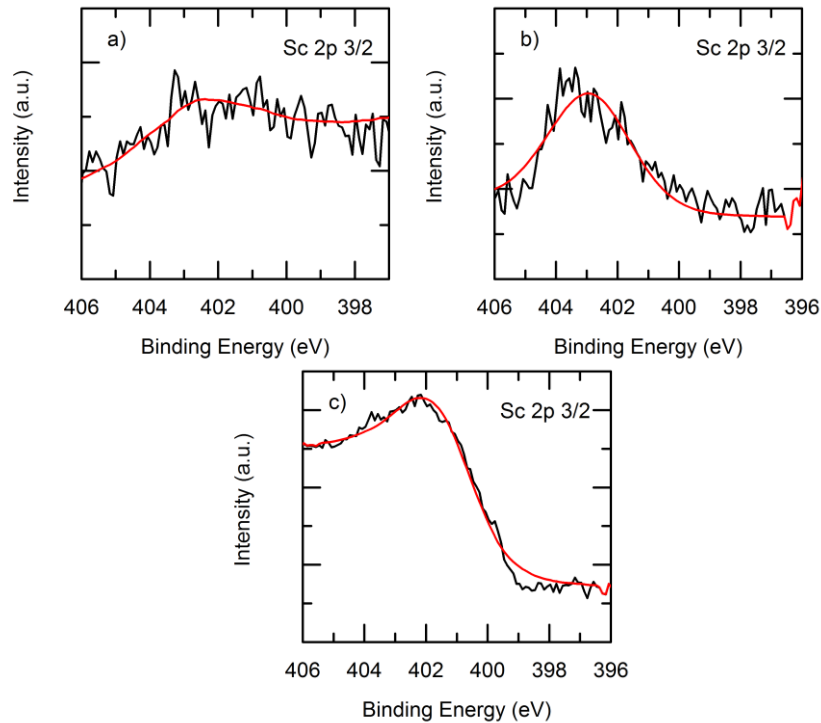

**Figure S9.** XPS spectra and fitted peaks for the Sc 2p 3/2 peaks of the Sc-SCO samples. a) 1%Sc-SCO b) 5%Sc-SCO c) 10%Sc-SCO

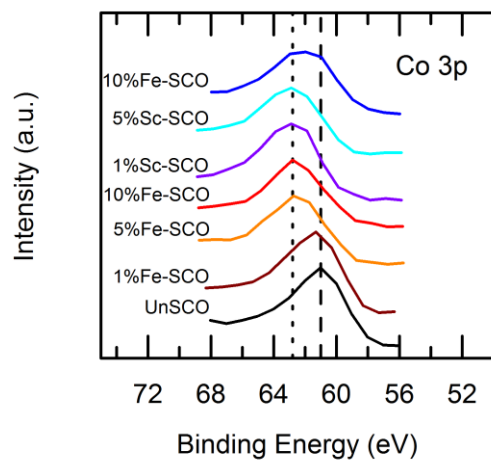

**Figure S10.** XPS spectra of the Co 3p region in all SCO samples. The dashed line lies on 61.0 eV, the dotted line lies on 62.8 eV



## TEM Figures of SCO Powders

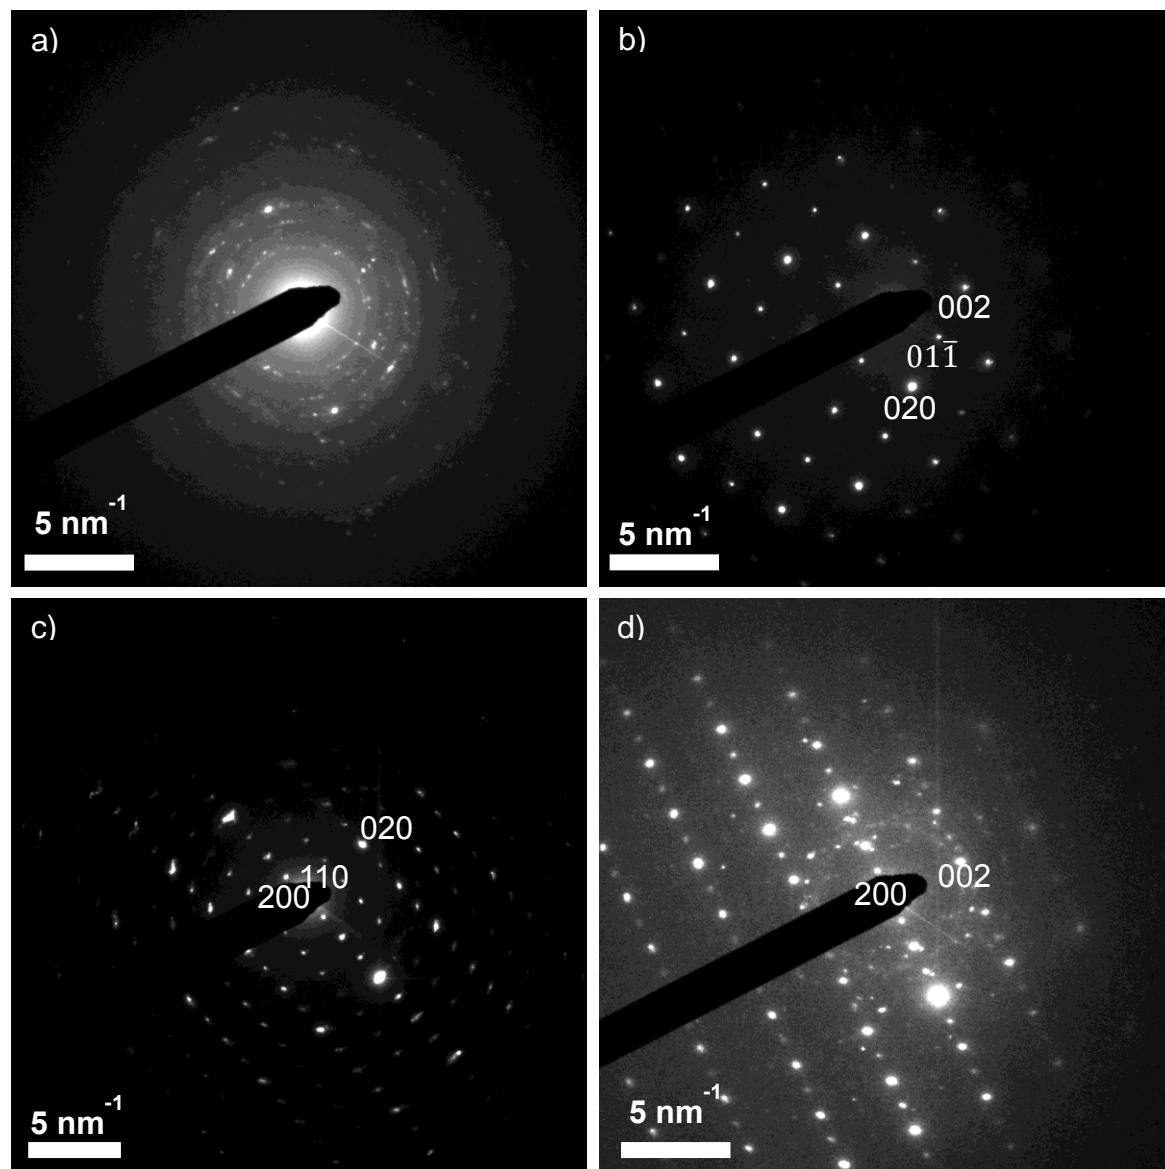

**Figure S11.** Selected area electron diffraction patterns of a) UnSCO, b) 5%Fe-SCO, c) 10%Fe-SCO), and d) 10% Sc-SCO showing the polycrystalline nature of the undoped material. The other diffraction patterns have been indexed as orthorhombic  $\text{SrCoO}_{2.5}$ .

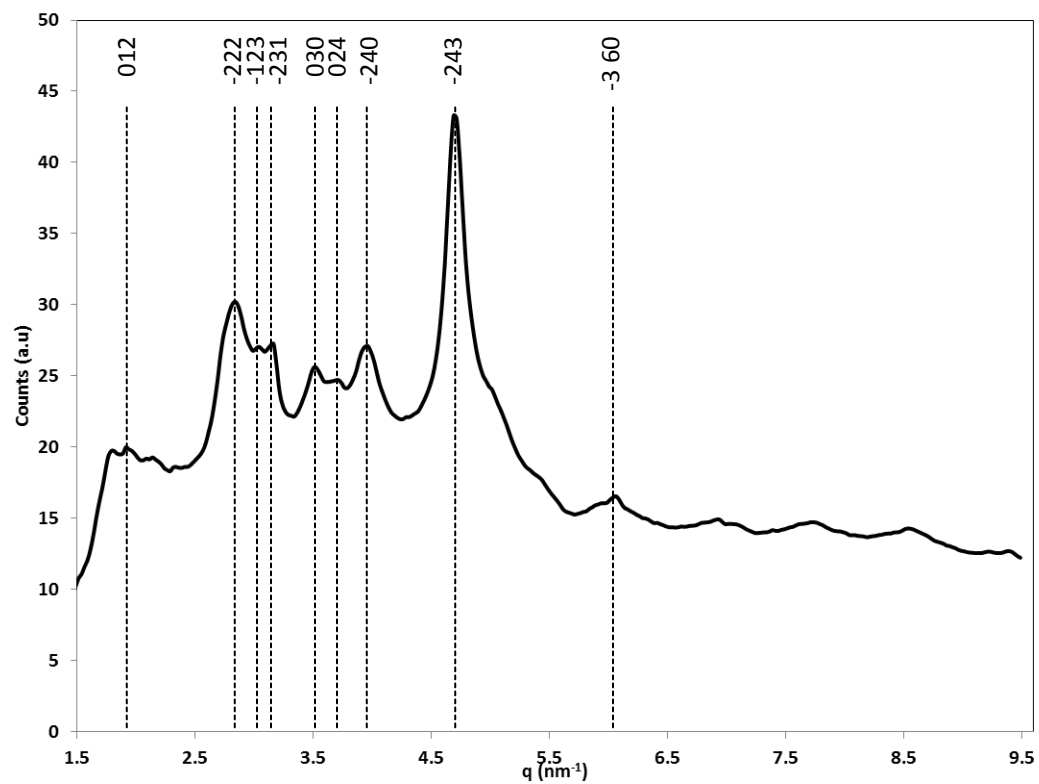

**Figure S12.** Radial distribution plot of the SAED in Figure SX1 for UnSCO integrated over 360° indexed as trigonal  $\text{Sr}_6\text{Co}_5\text{O}_{15}$ .

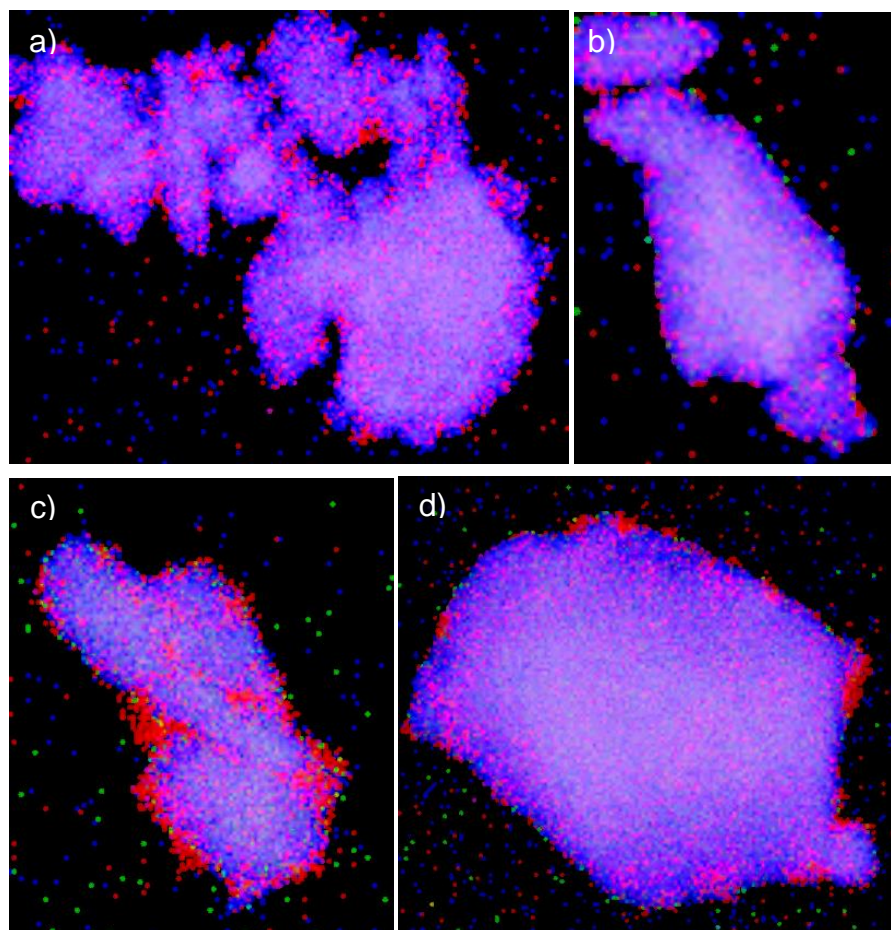

**Figure S13.** Electron dispersive X-ray spectroscopy maps of a) UnSCO, b) 5%Fe-SCO, c) 10%Fe-SCO, and d) 10% Sc-SCO. Cobalt is blue, strontium is red, and the dopant (Fe or Sc) is green.

## SEM Figures of All SCO Electrodes

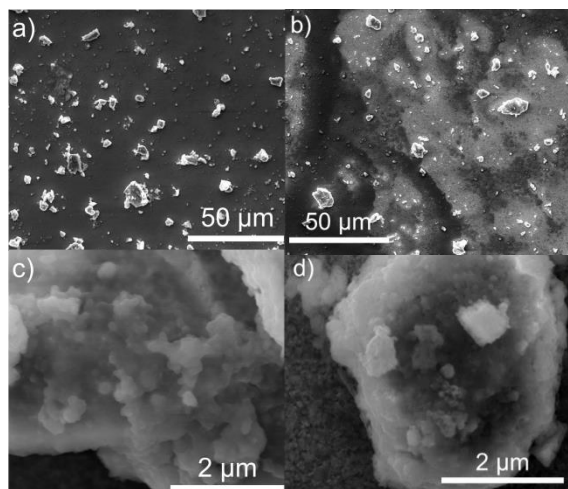

**Figure S14.** SEM images of a) 10%Fe-SCO and b) undoped SCO microparticle catalyst on conductive FTO substrate. Surface morphology for the c) 10%Fe-SCO and d) undoped SCO microparticles both appear rough, and composed of sintered microparticles.

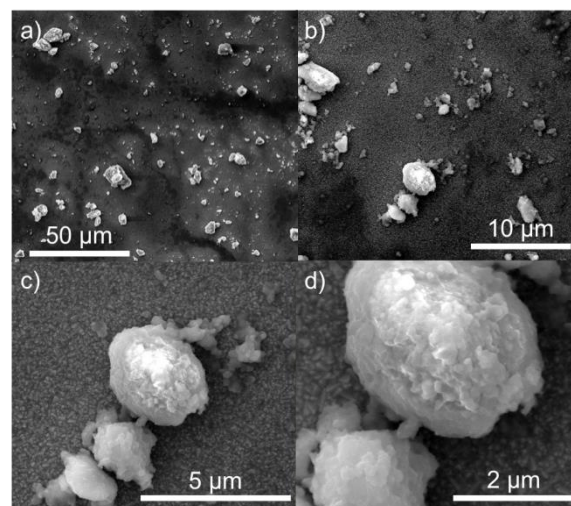

**Figure S16.** SEM images of 1%Fe-SCO Electrode

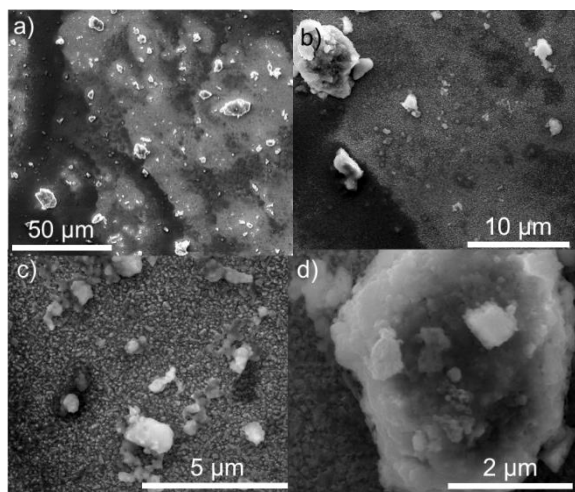

**Figure S15.** SEM images of UnSCO Electrode

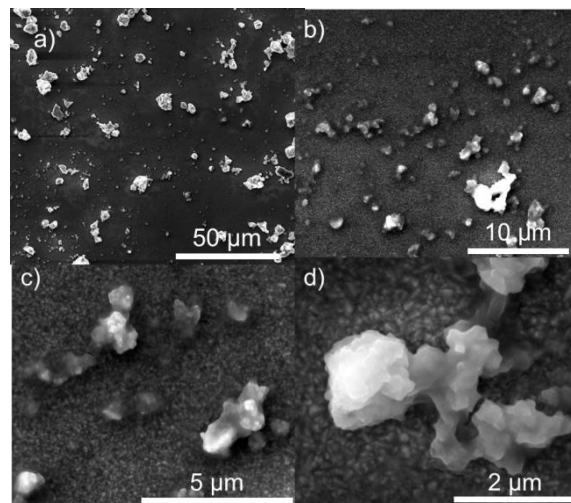

**Figure S17.** SEM images of 5%Fe-SCO Electrode



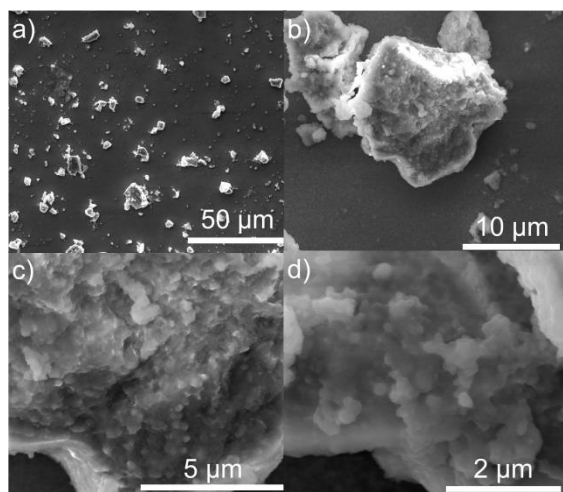

**Figure S18.** SEM images of 10%Fe-SCO Electrode

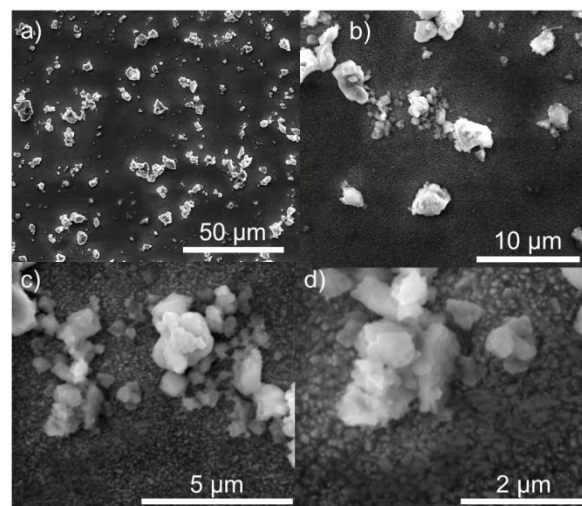

**Figure S20.** SEM images of 5%Sc-SCO Electrode

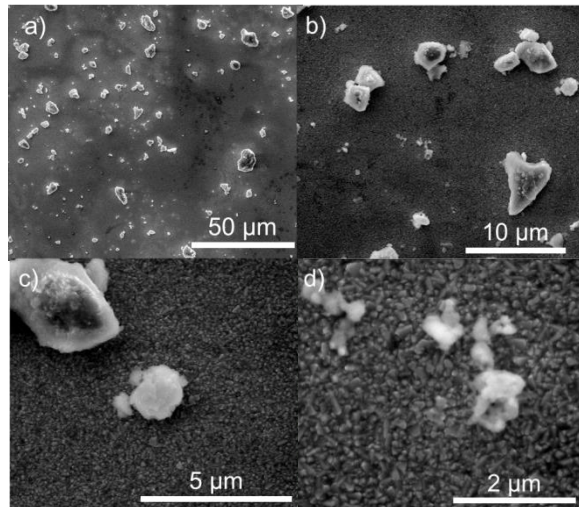

**Figure S19.** SEM images of 1%Sc-SCO Electrode

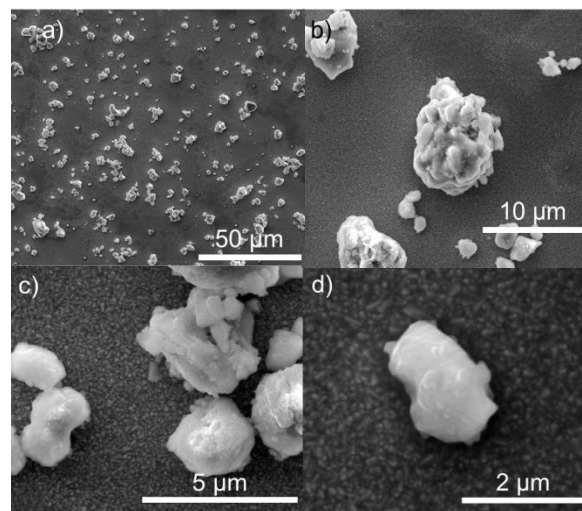

**Figure S21.** SEM images of 10%Sc-SCO Electrode

## OER Performance

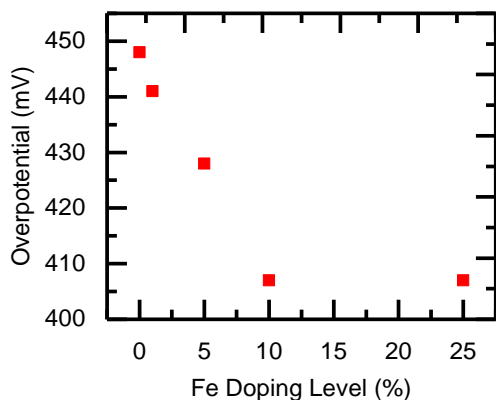

**Figure S22.** Plot of measured overpotential at 10 mA/cm<sup>2</sup> versus [Fe] in several Fe-doped SCO electrodes

## Supporting Tables

**Table S1:** Tolerance values for the seven selected SCO samples examined in this study.  $t$  shows a transition to unity with increasing concentrations of both Fe and Sc dopants.

| Sample    | $t$   |
|-----------|-------|
| UnSCO     | 1.002 |
| 1%Fe-SCO  | 1.002 |
| 5%Fe-SCO  | 1.001 |
| 10%Fe-SCO | 1.000 |
| 1%Sc-SCO  | 1.001 |
| 5%Sc-SCO  | 0.996 |
| 10%Sc-SCO | 0.989 |

**Table S2:** Atomic percentage of Fe and Sc dopants as measured using XPS, and the binding energy of the 2p 3/2 peaks both elements.

| Sample    | Percent Fe/Sc (%) | Binding Energy (eV) |
|-----------|-------------------|---------------------|
| 1%Fe-SCO  | 1.14              | 711.9               |
| 5%Fe-SCO  | 3.78              | 712.2               |
| 10%Fe-SCO | 9.10              | 712.9               |
| 1%Sc-SCO  | 3.95              | 402.7               |
| 5%Sc-SCO  | 5.18              | 402.9               |
| 10%Sc-SCO | 13.61             | 401.6               |

**Table S3:** FWHM and Co 2p 3/2 binding energies for the Fe-SCO samples. As iron concentration increases, the FWHM of the peak increases as well.

| Sample    | Binding Energy (eV) | FWHM |
|-----------|---------------------|------|
| 1%Fe-SCO  | 780.2               | 2.49 |
| 5%Fe-SCO  | 781.5               | 3.20 |
| 10%Fe-SCO | 781.2               | 3.37 |

**Table S4:** OER mass activities of several perovskites.  $\text{LaNiO}_3$ ,  $\text{LaNi}_{0.75}\text{Fe}_{0.25}\text{O}_3$ ,  $\text{LaCoO}_3$ , and  $\text{LaMnO}_3$  are all supported on N-doped carbon on a glassy carbon rotating disk electrode.

| Sample                                                | Mass Activity (mA/mg) |
|-------------------------------------------------------|-----------------------|
| $\text{SrCo}_{0.9}\text{Fe}_{0.1}\text{O}_{3-\delta}$ | 6.5                   |
| $\text{LaNiO}_3^*$                                    | 90.0                  |
| $\text{LaNi}_{0.75}\text{Fe}_{0.25}\text{O}_3^*$      | 82.0                  |
| $\text{LaCoO}_3^*$                                    | 100.0                 |
| $\text{LaMnO}_3^*$                                    | 92                    |

\* Adapted from Reference 51
